# Supplementary figures and images for: Early ECMO Initiation as a Bridge for Central Airway Obstruction Patients Caused by Neck and Chest Tumors to Emergency Surgery Operations
Source: Research Square preprint supplement (doi:10.21203/rs.3.rs-1977866/v2), 2022-09-21

Raw data of case3 CT


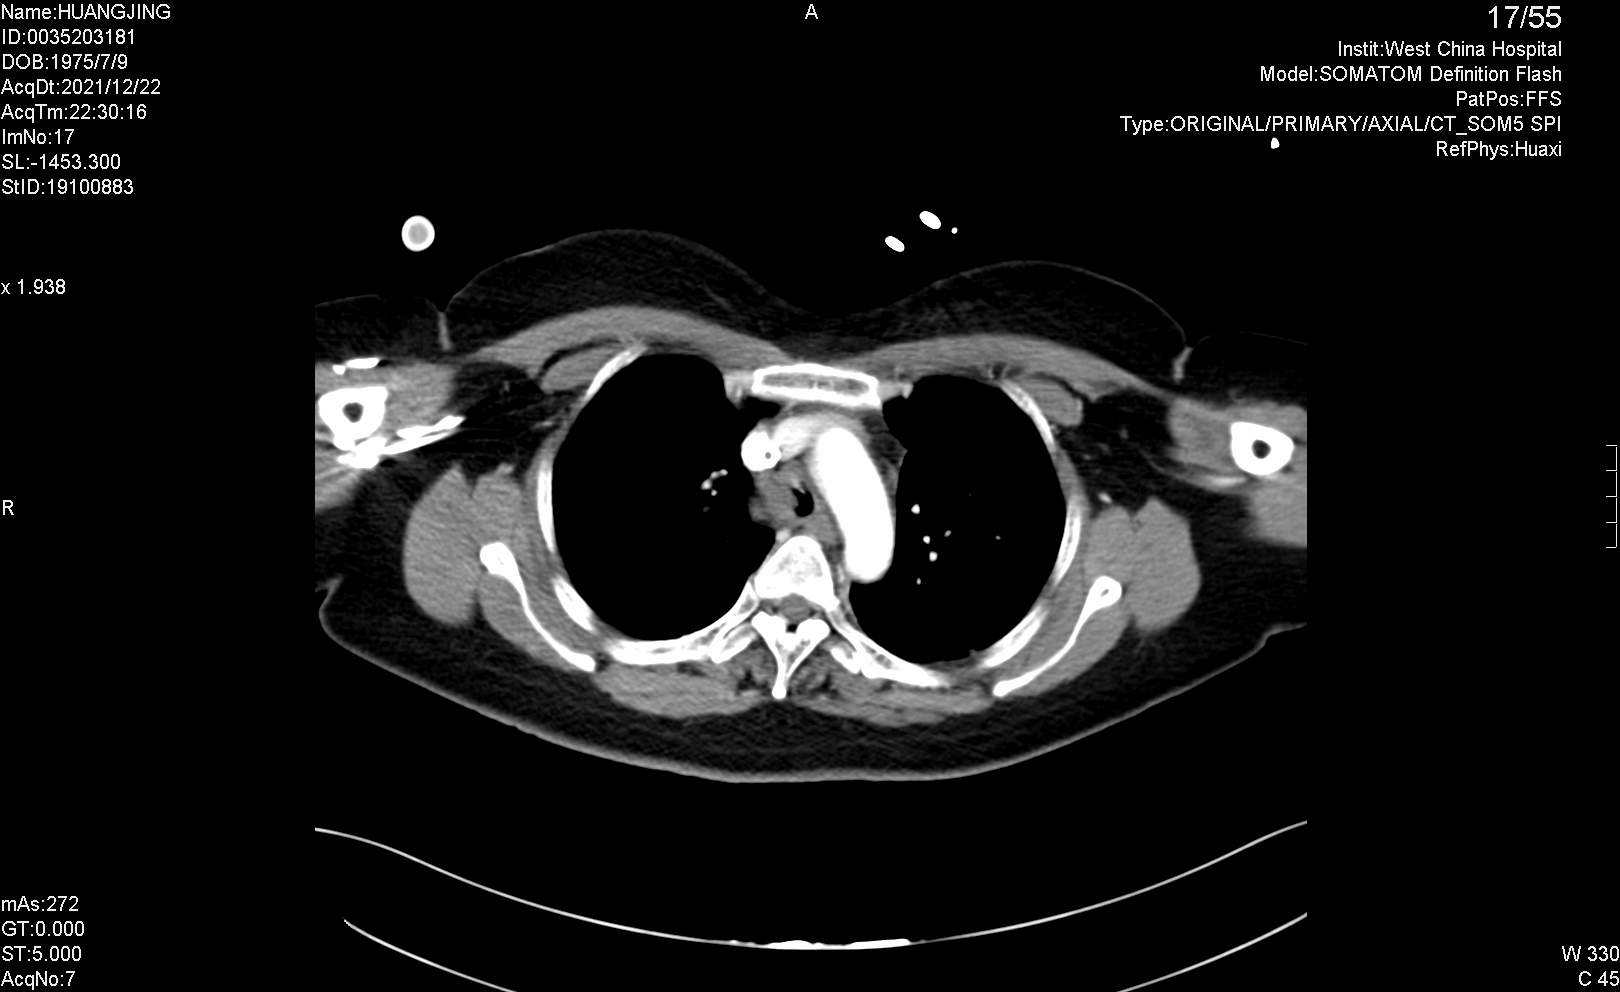


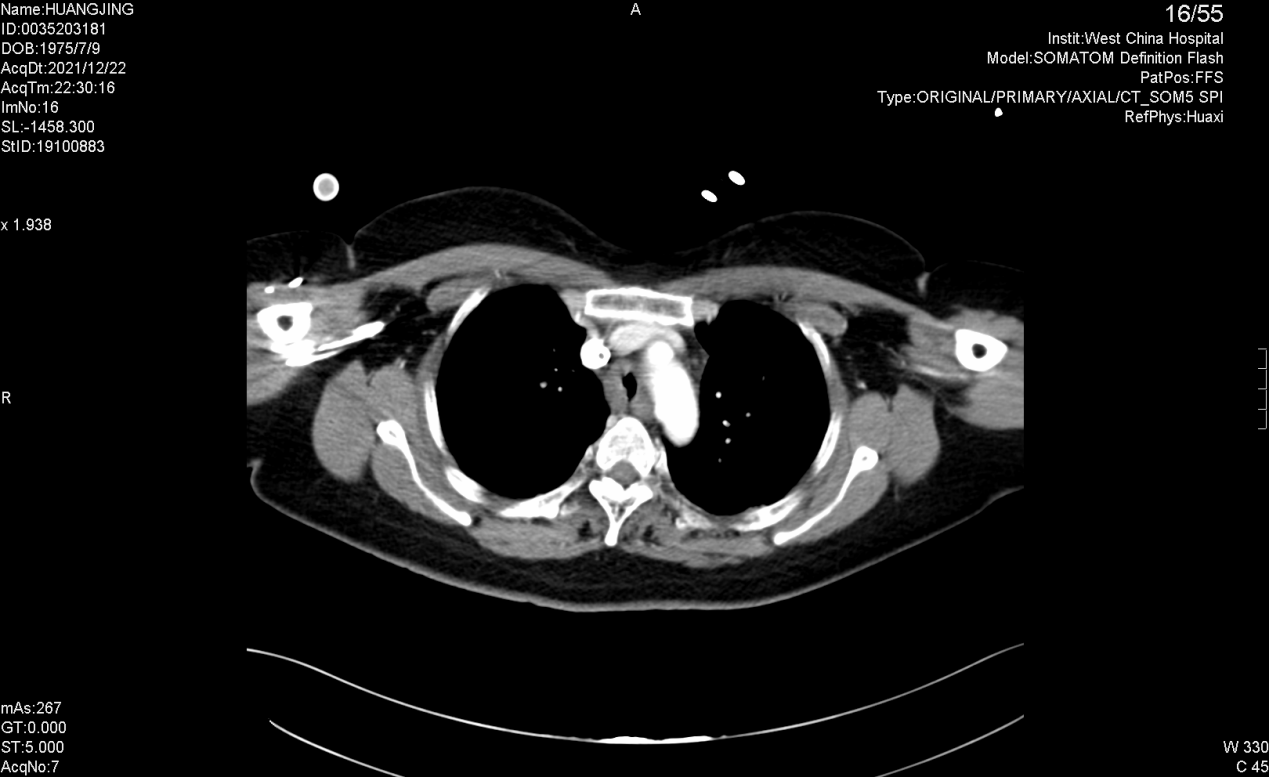


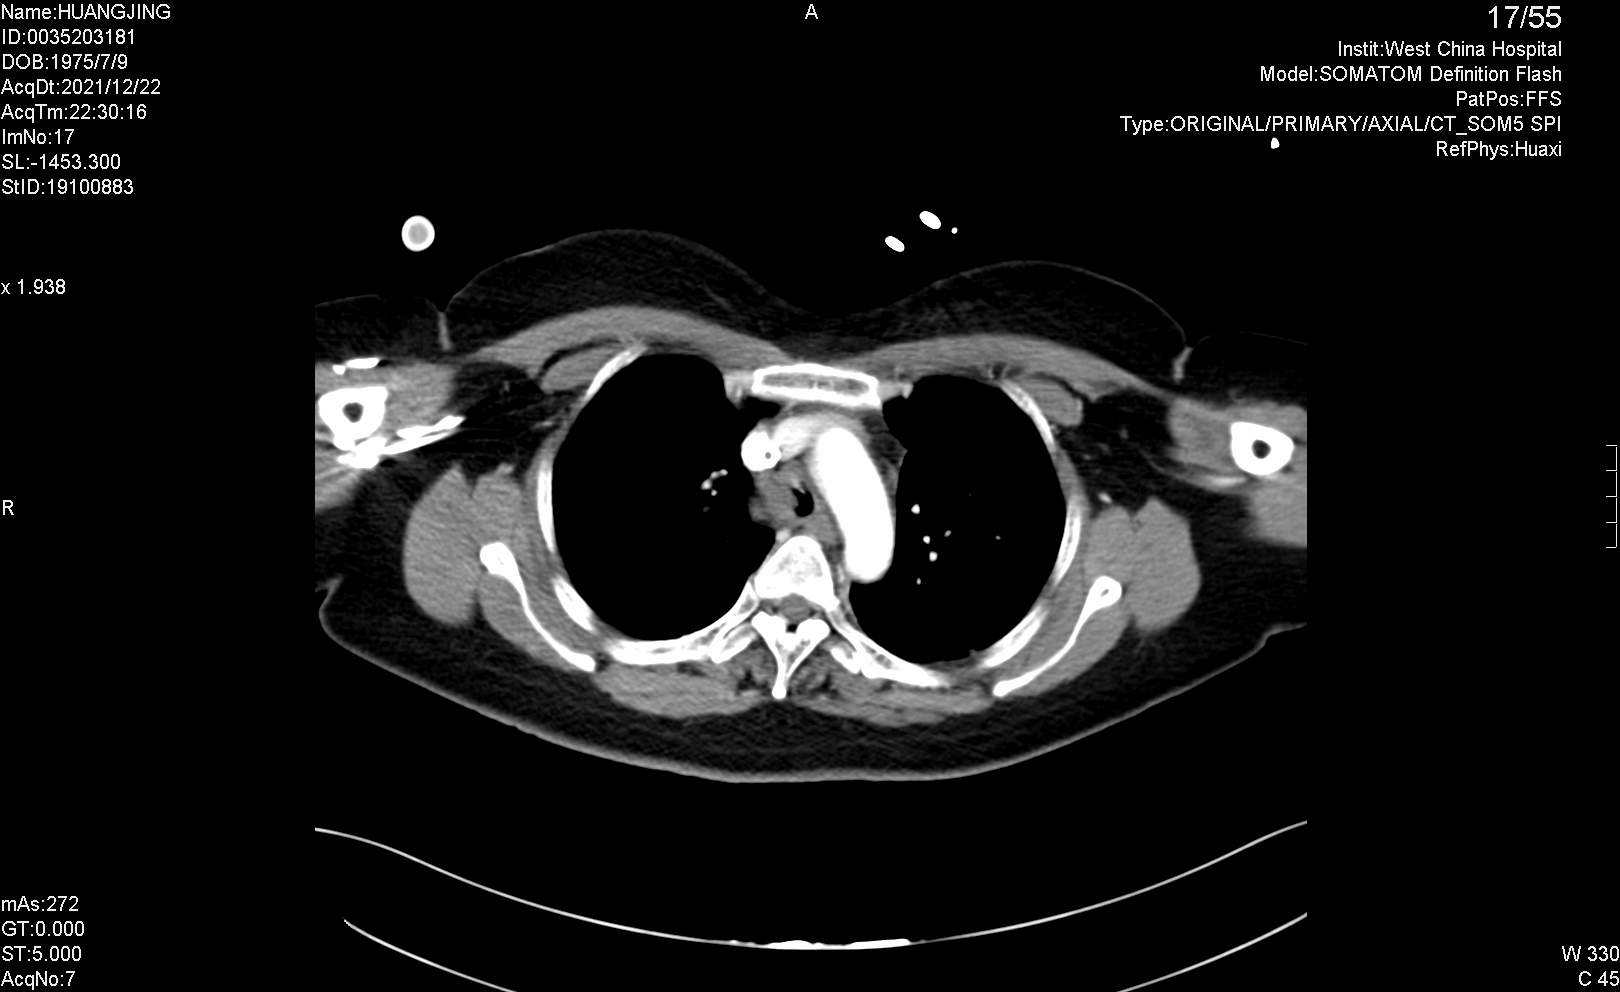


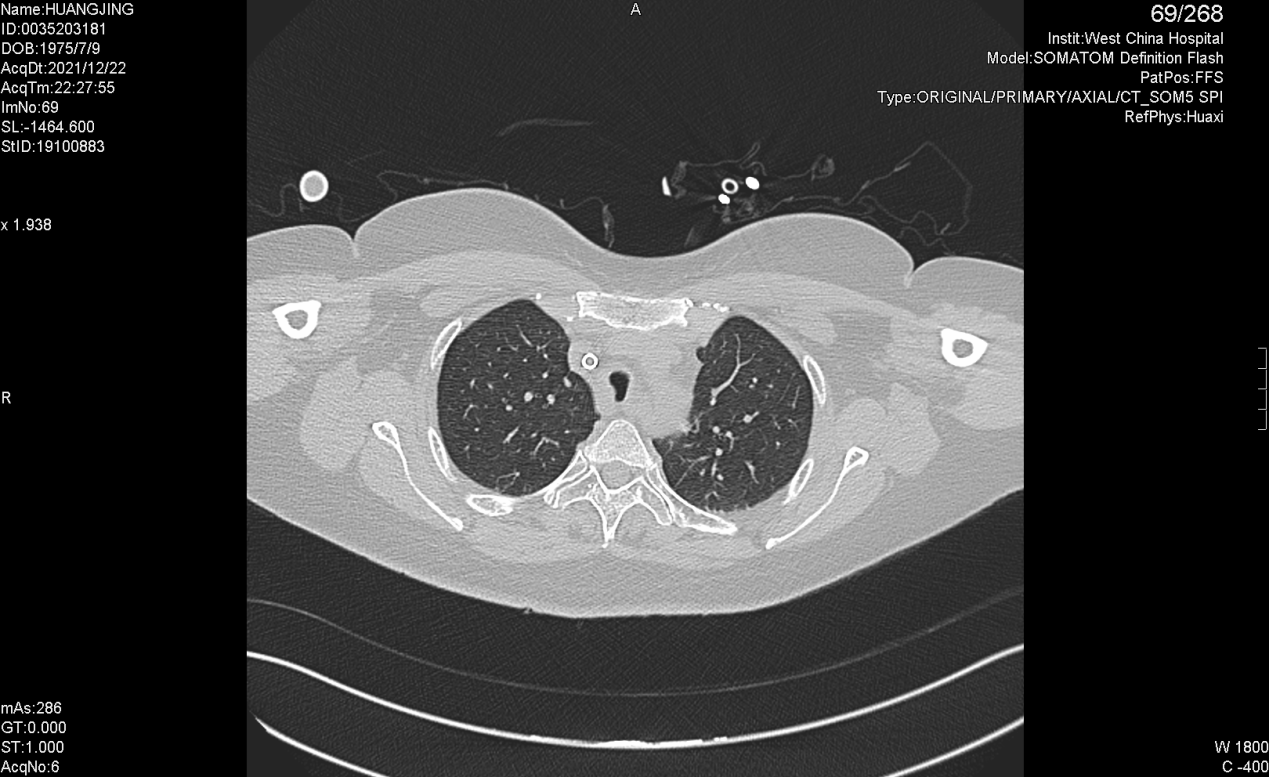


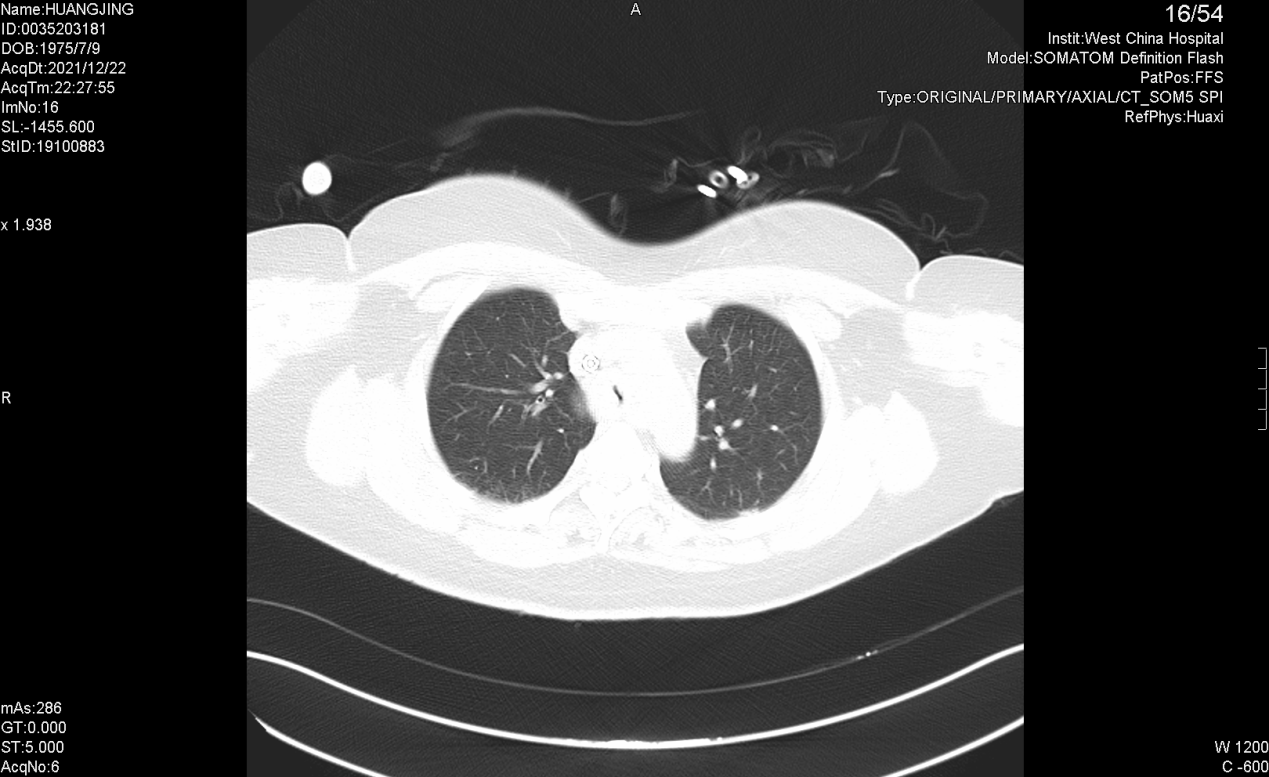


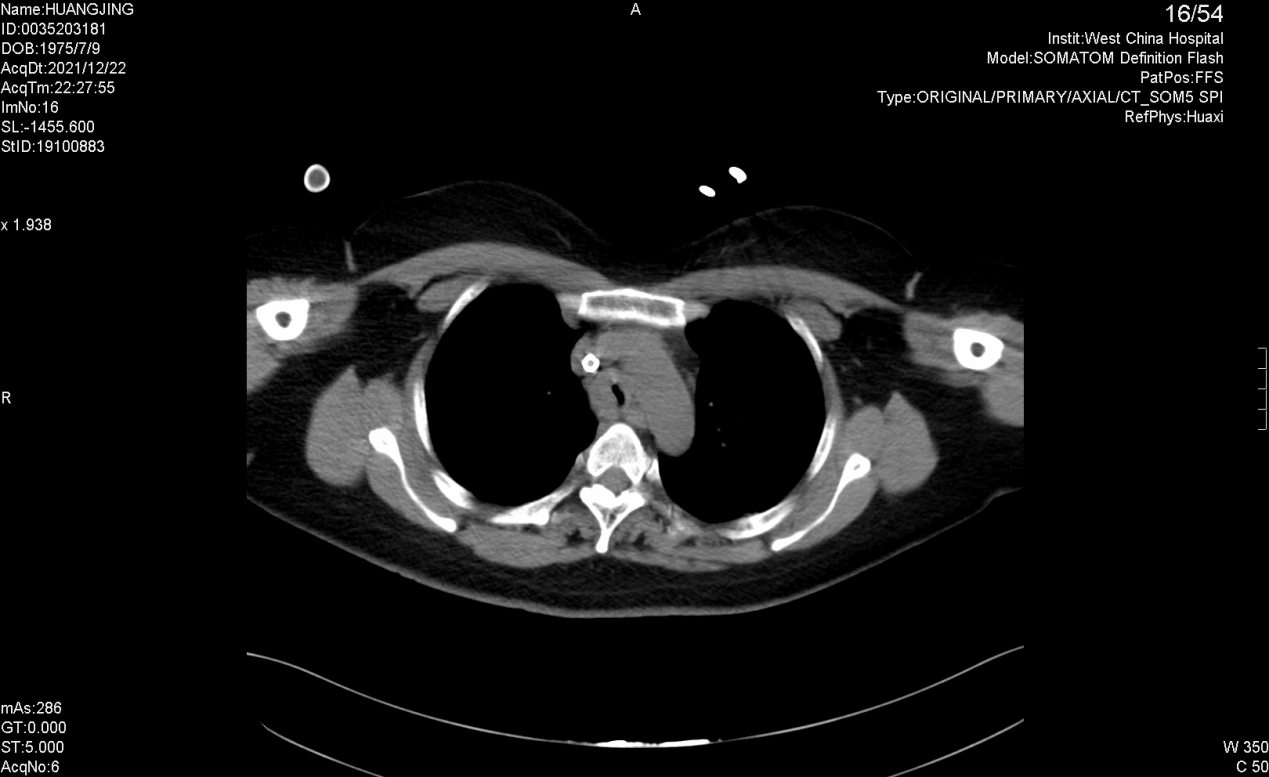

Supplement: Supplementary file 1 [file 146e7e81f36a30a73f792cb0.docx]

Raw data of case2 CT


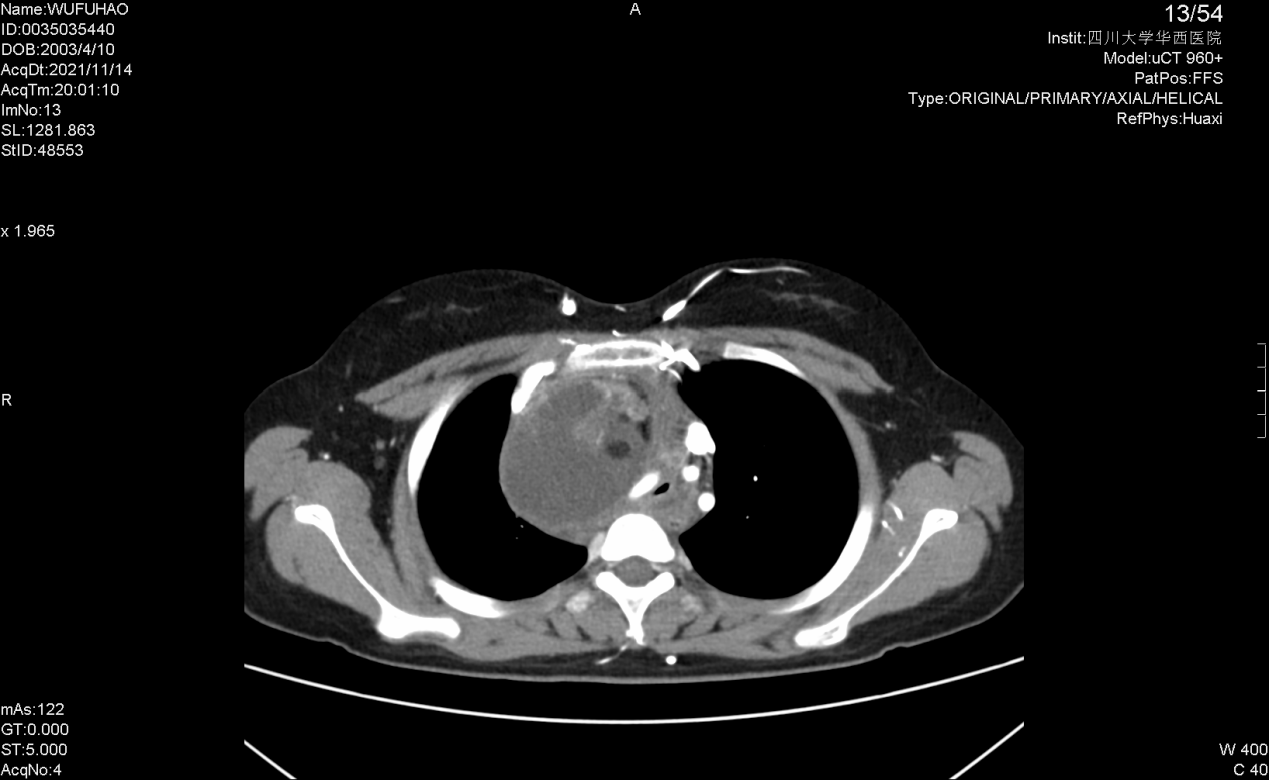


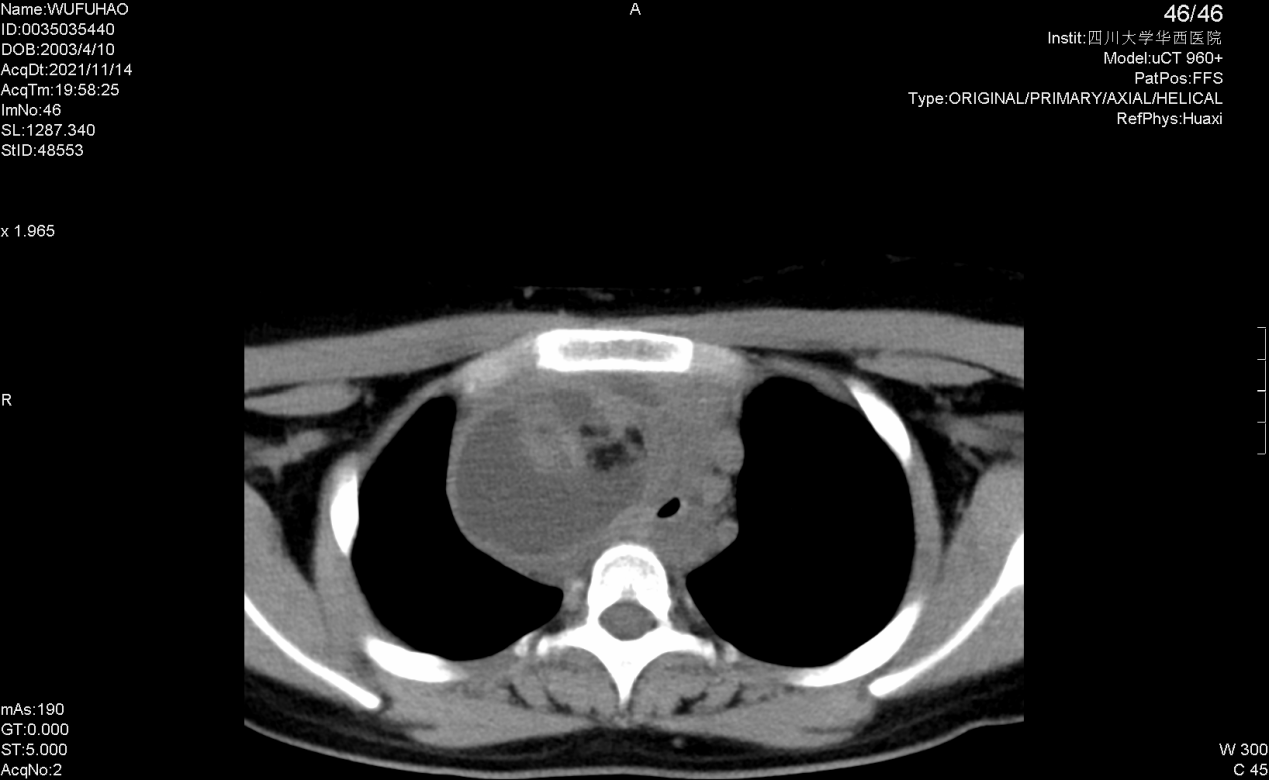


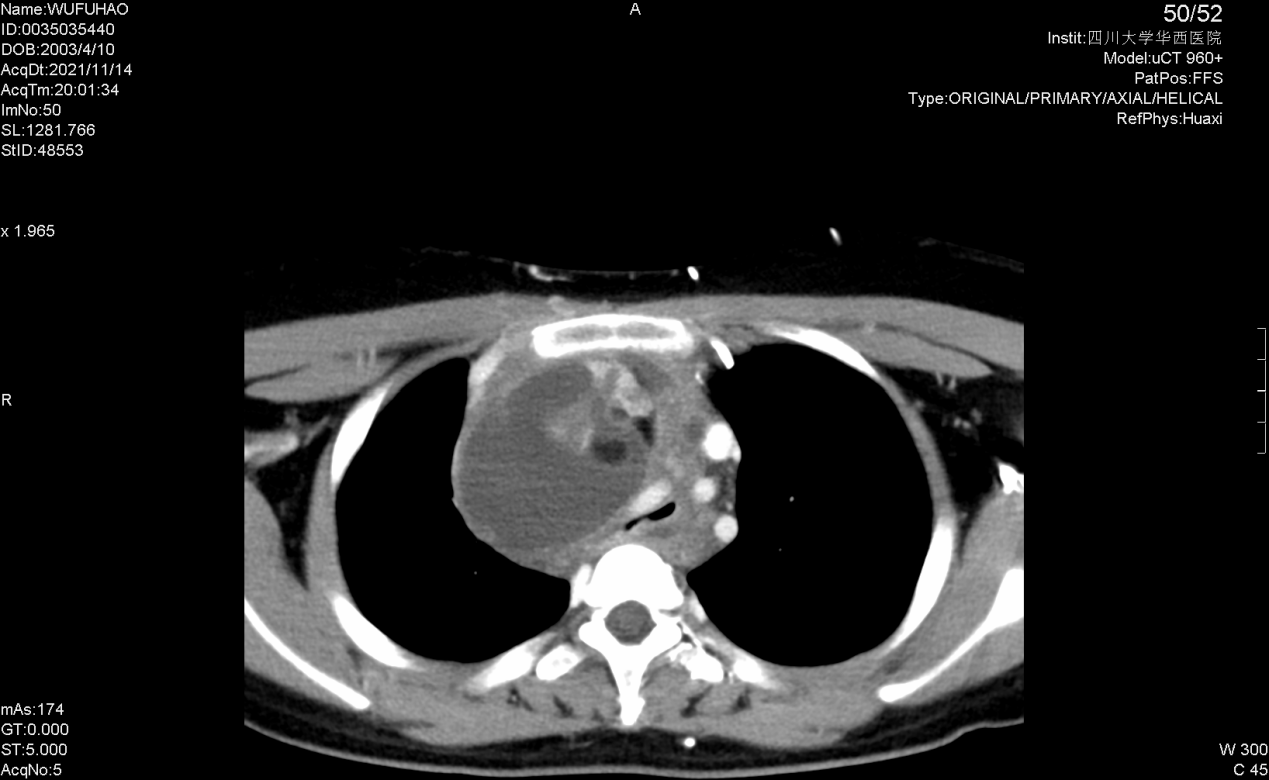


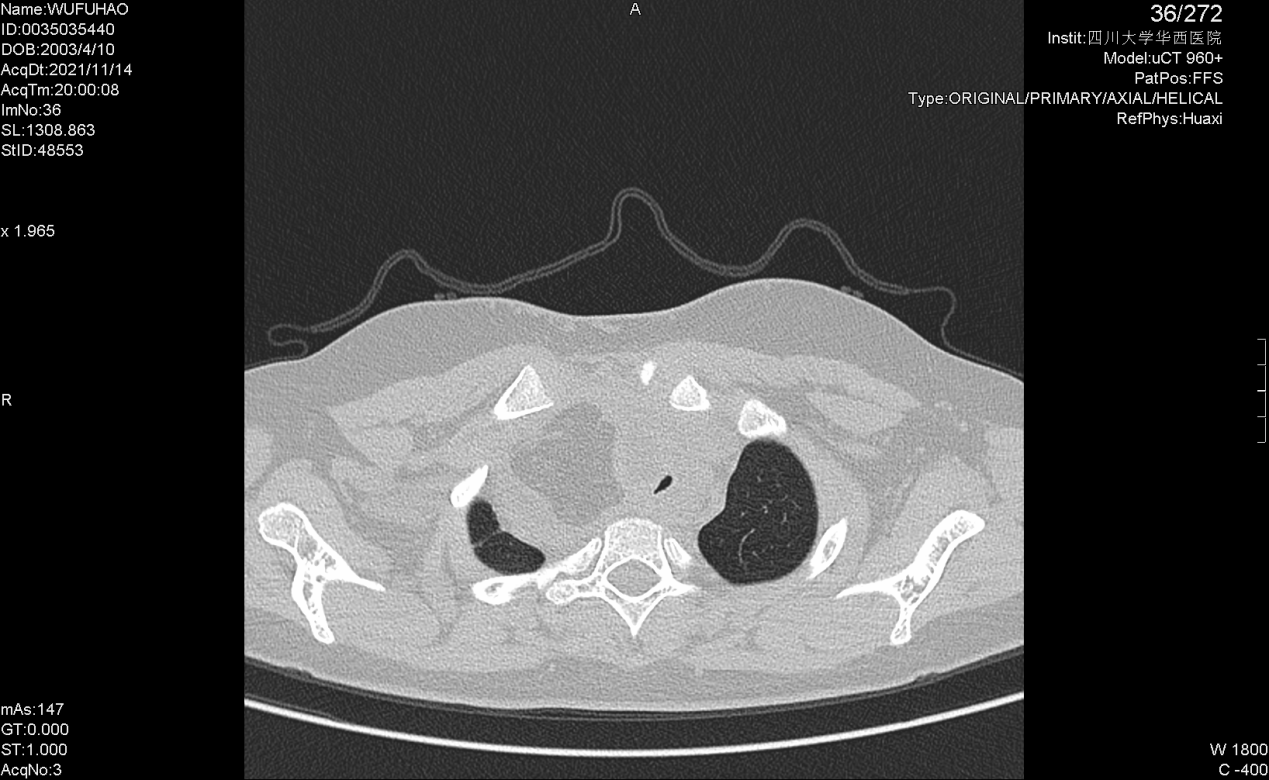


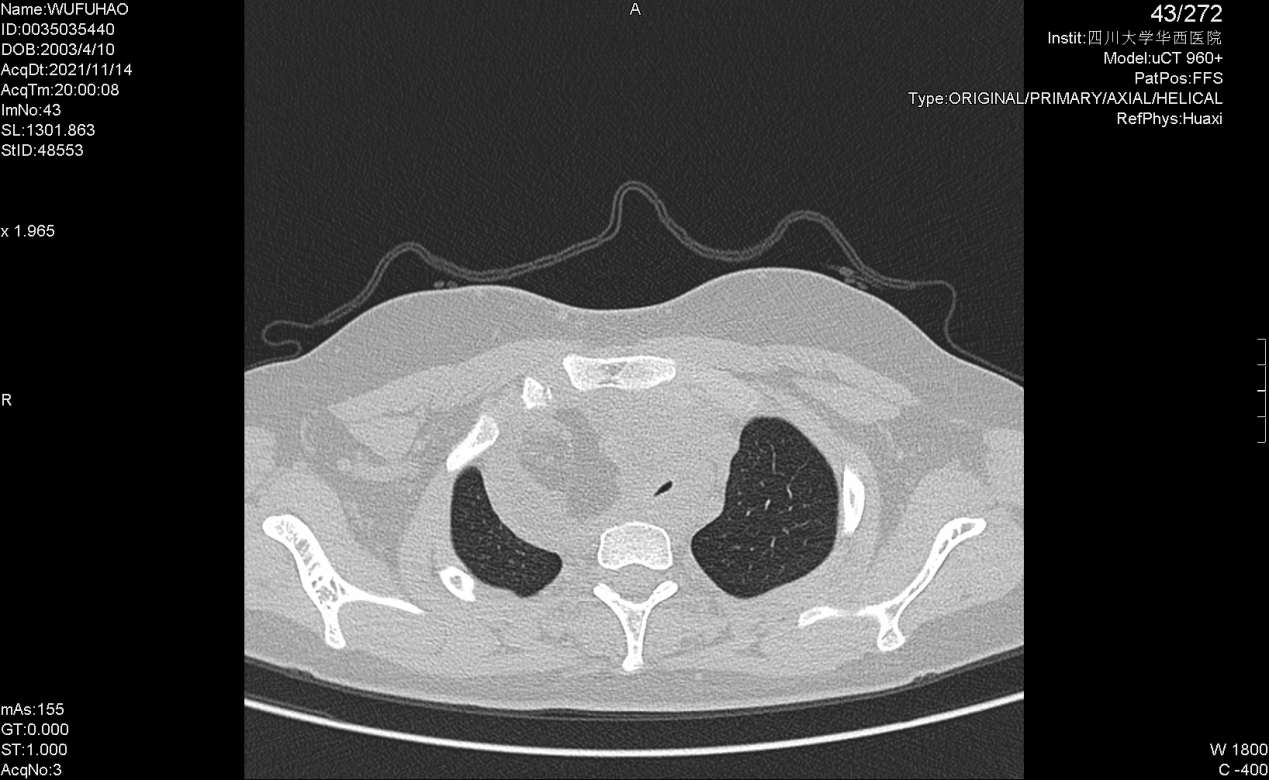

Supplement: Supplementary file 2 [file 8ed75a675f0ed54c7a4051a7.docx]

Raw data of case1 CT


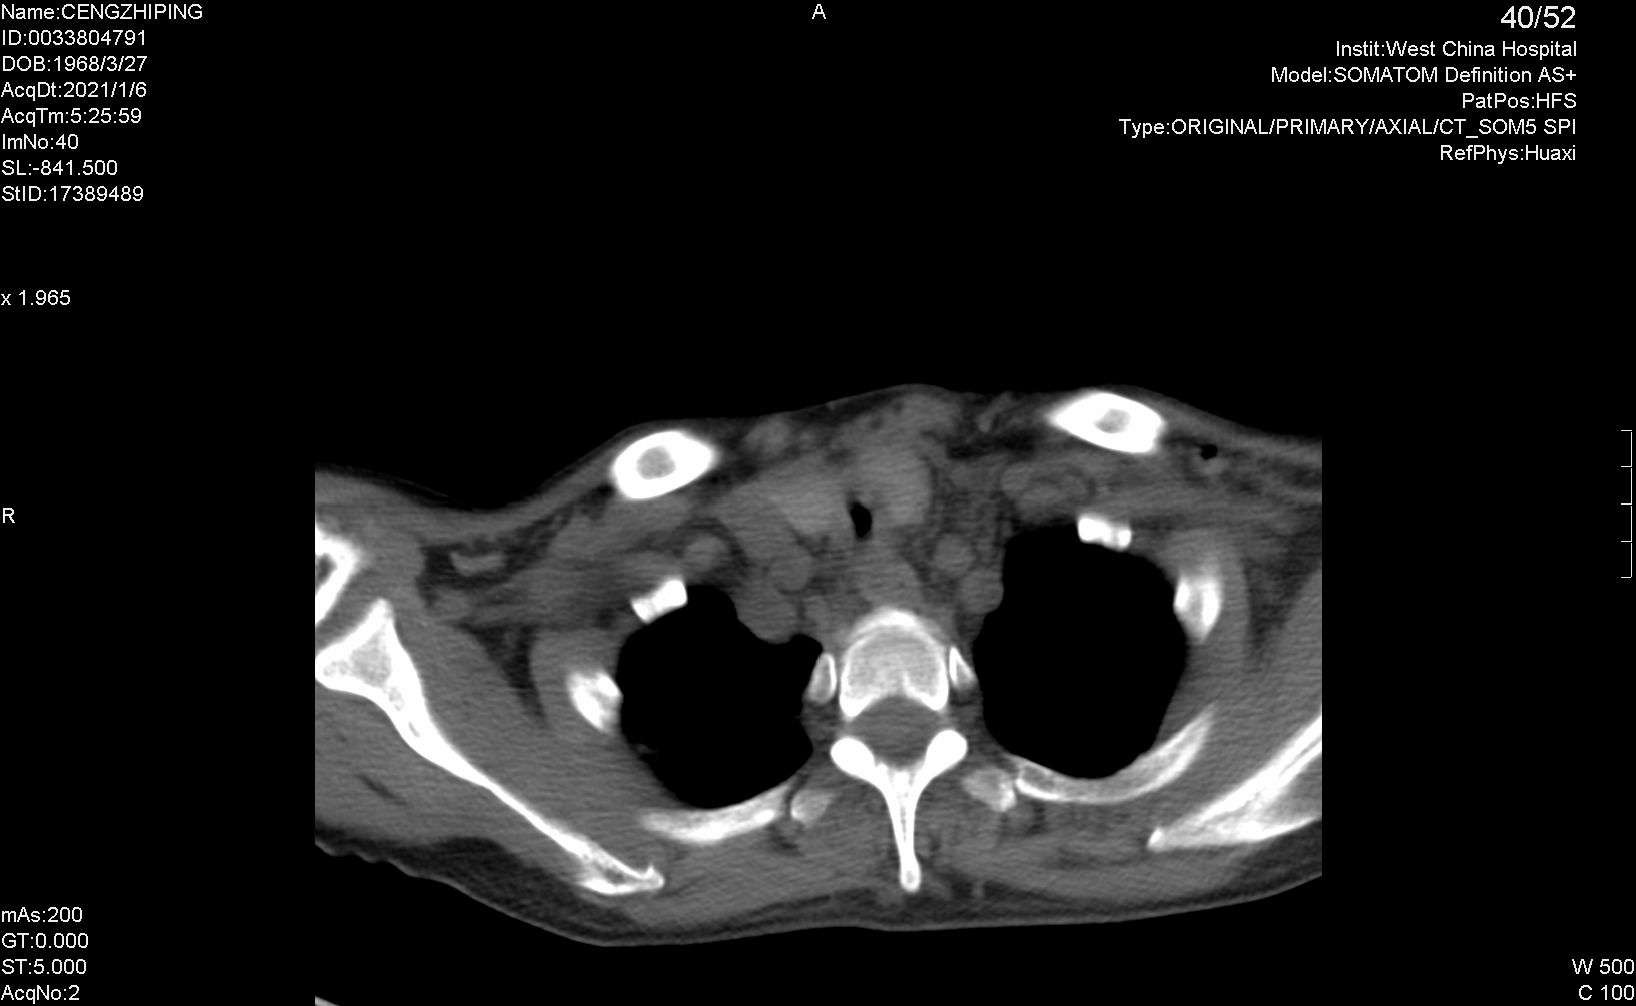


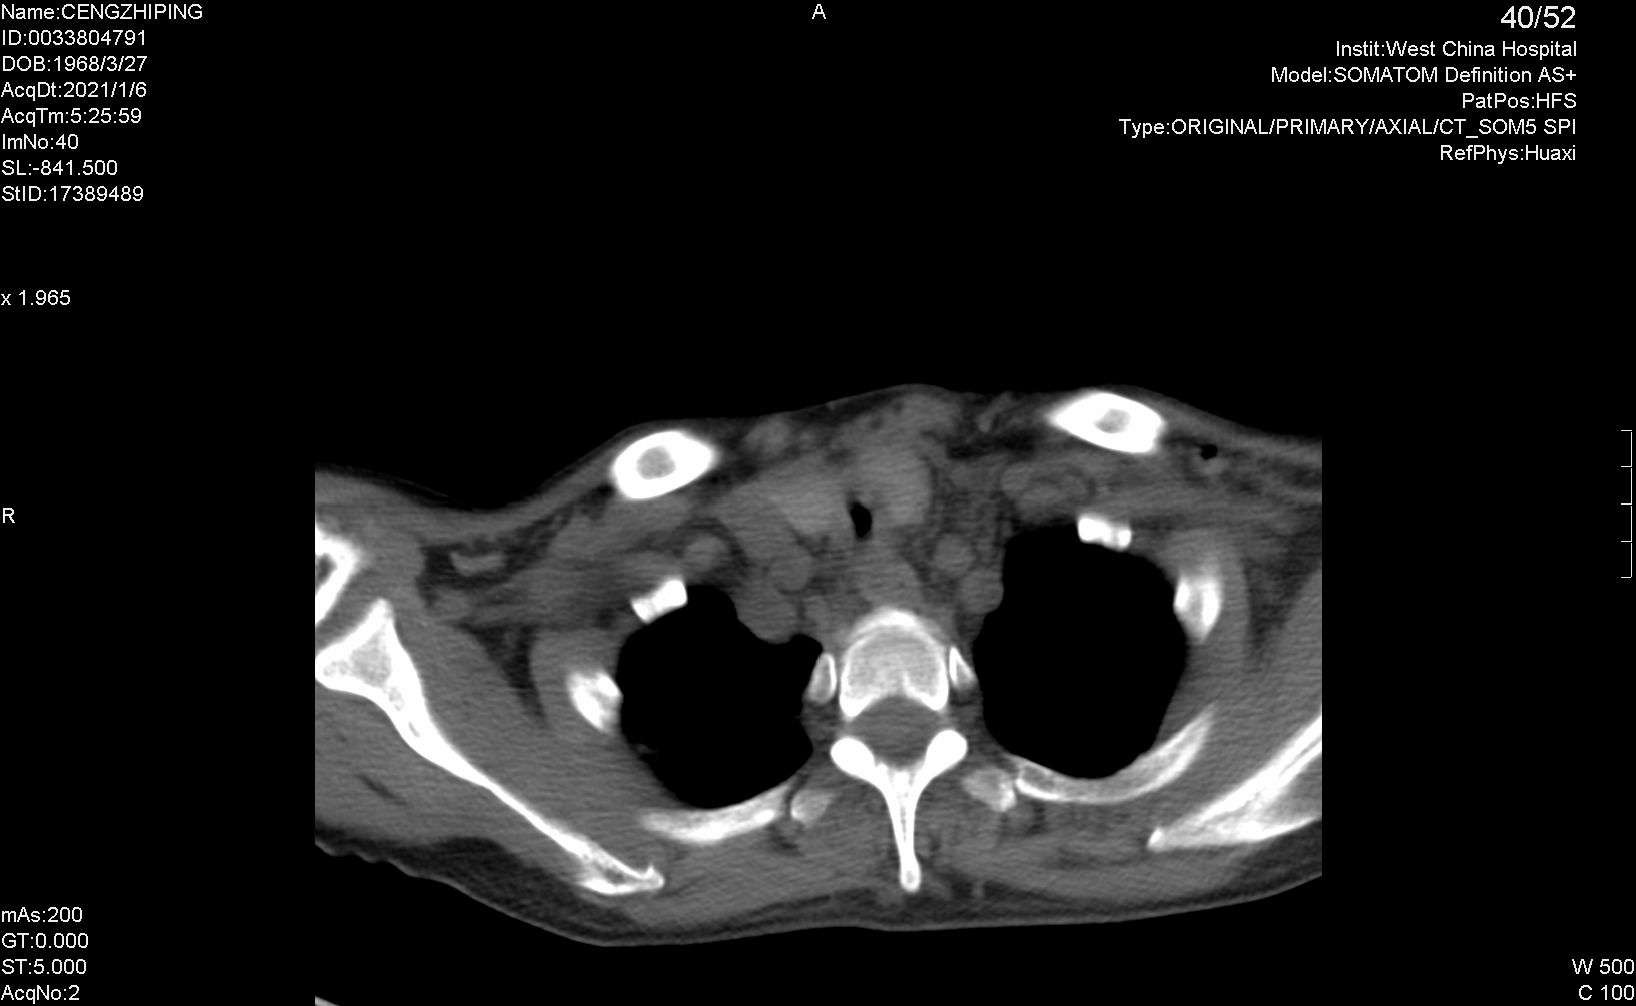


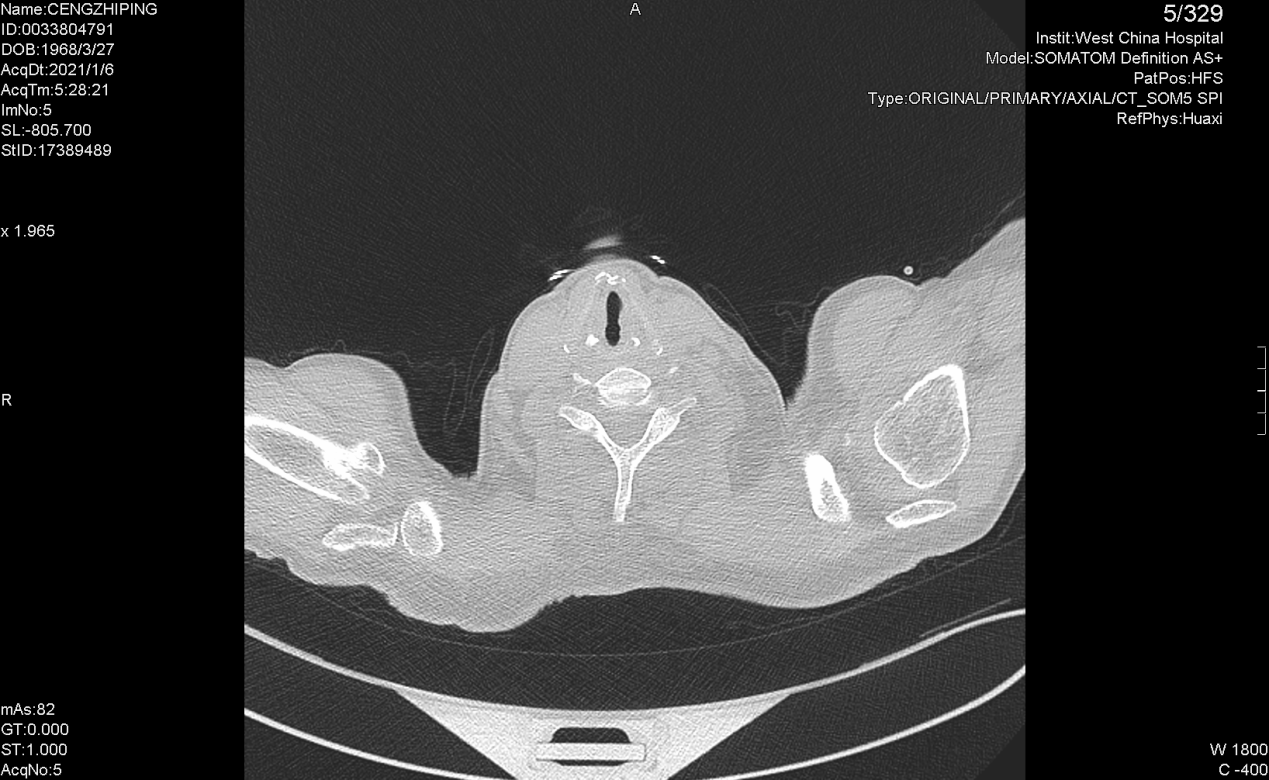


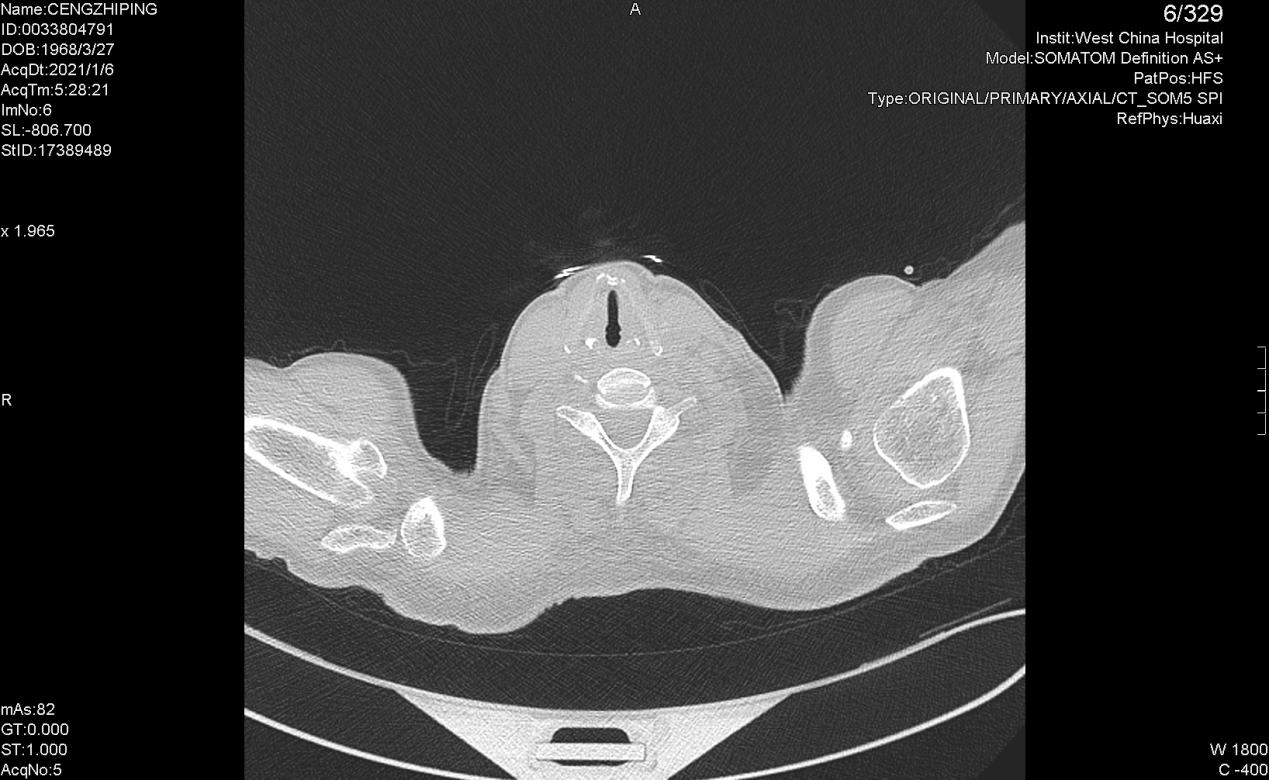


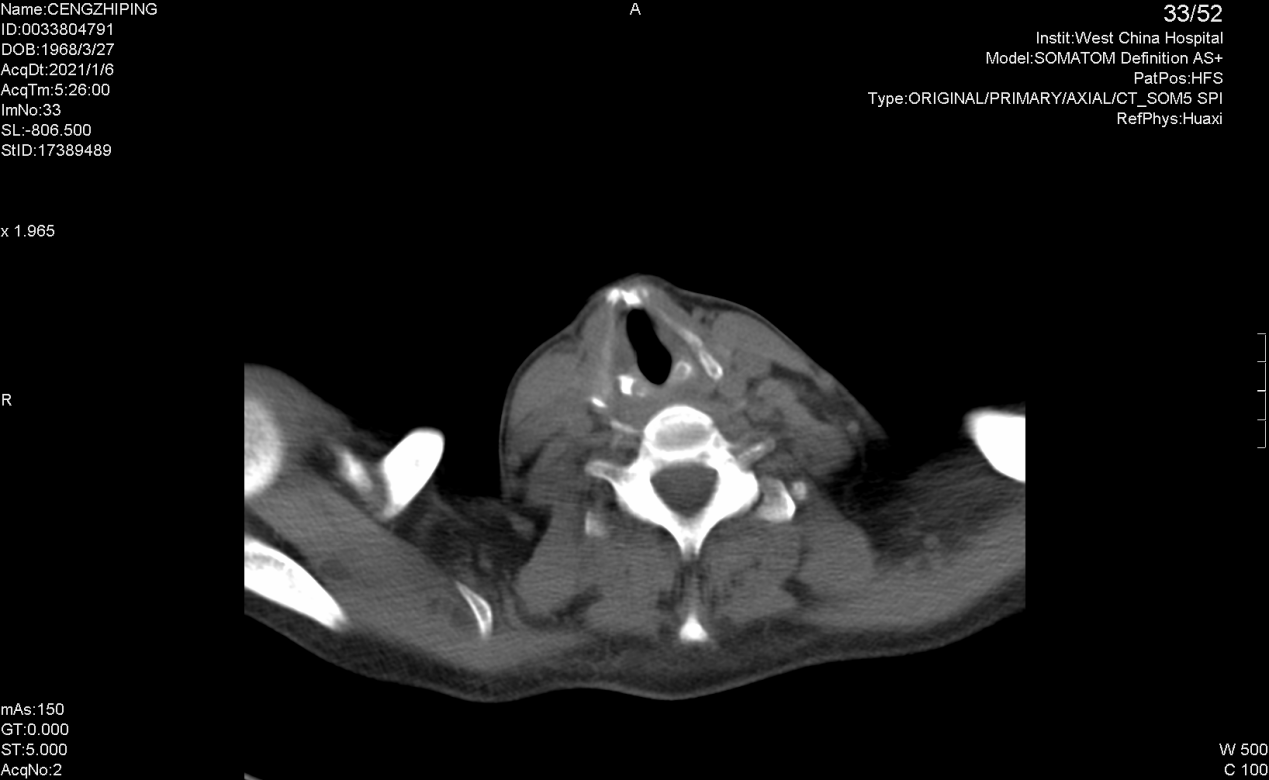


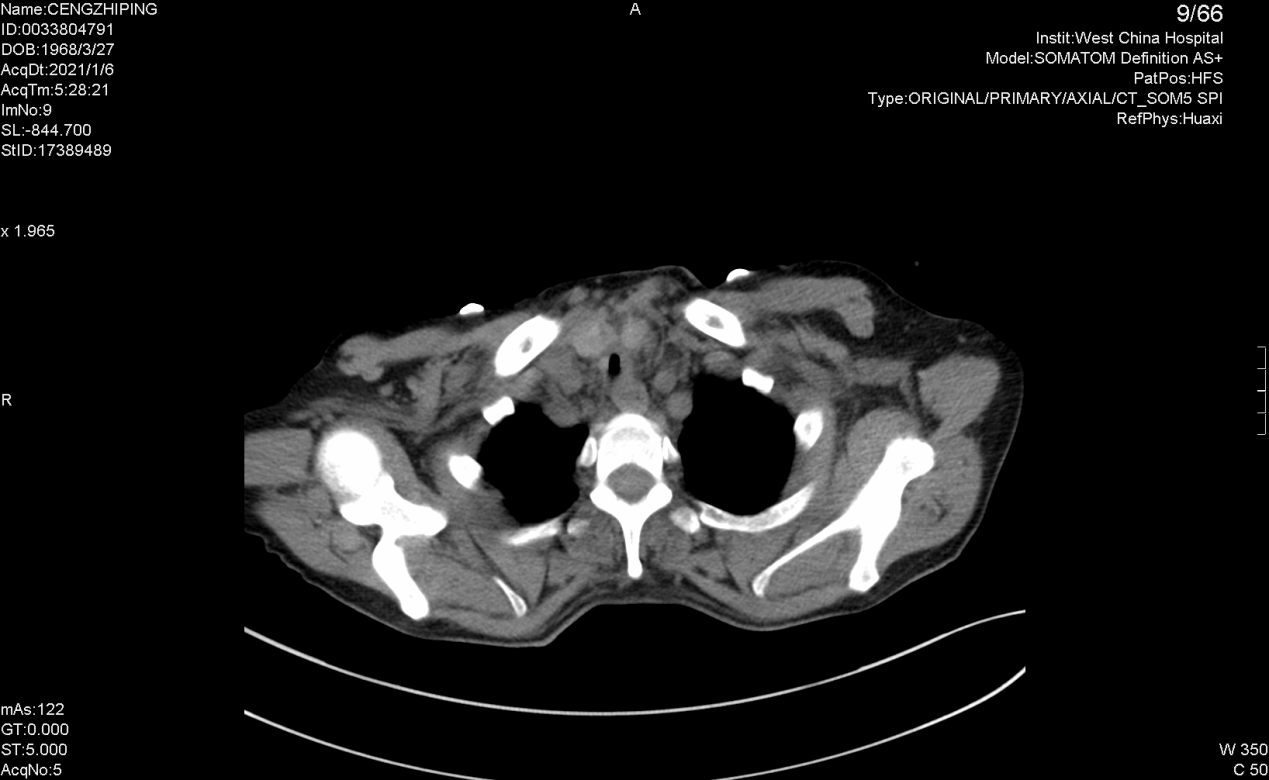


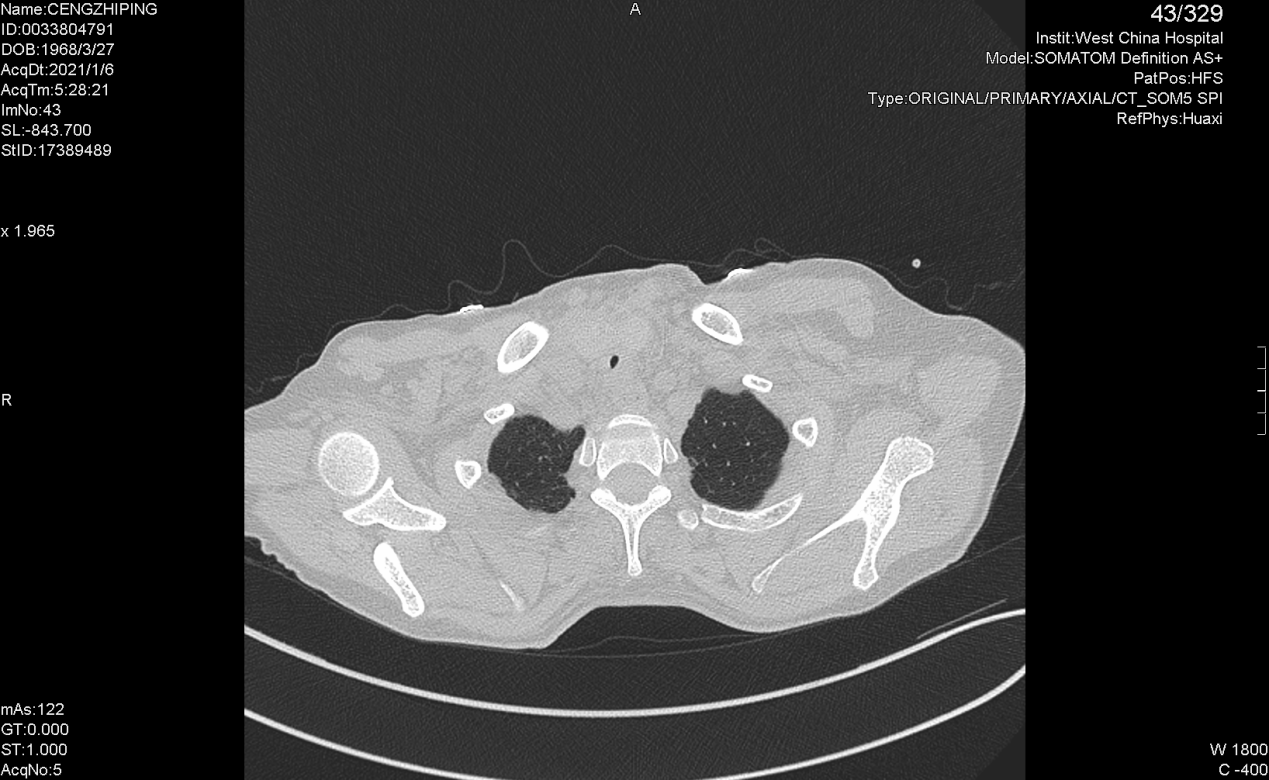


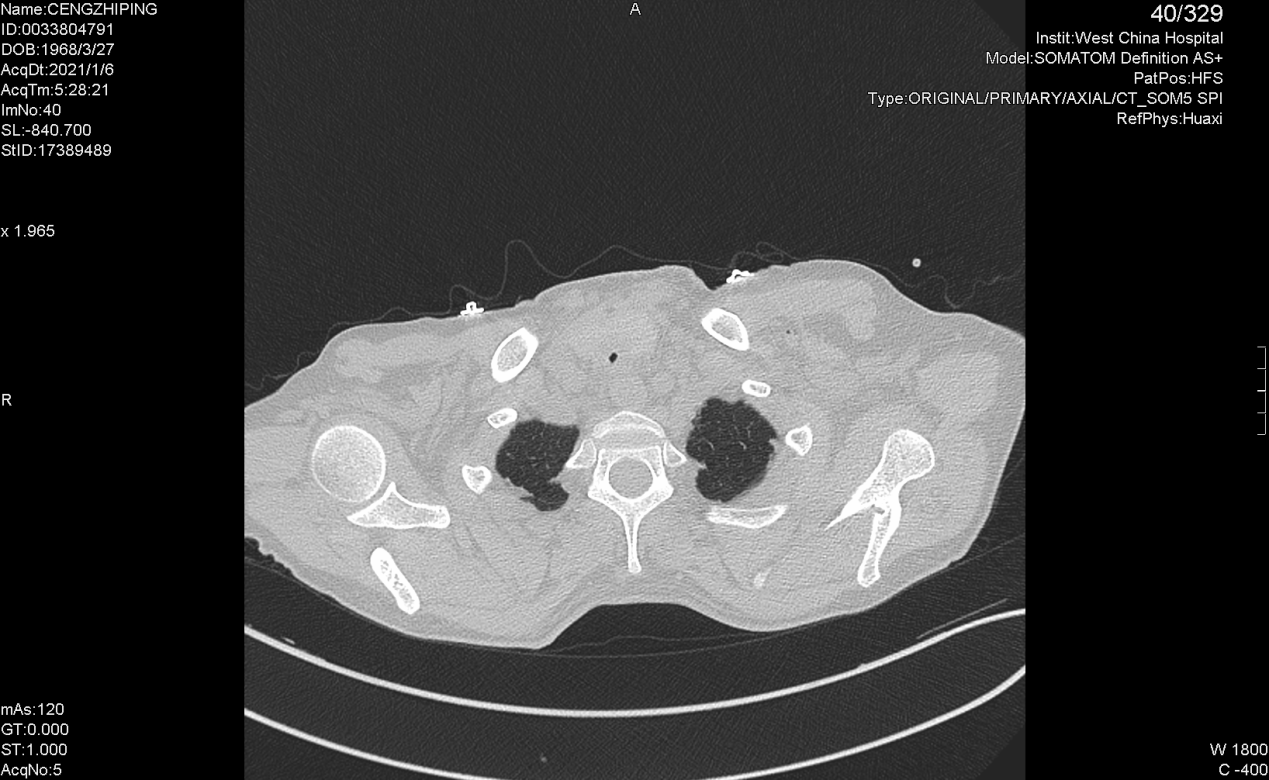


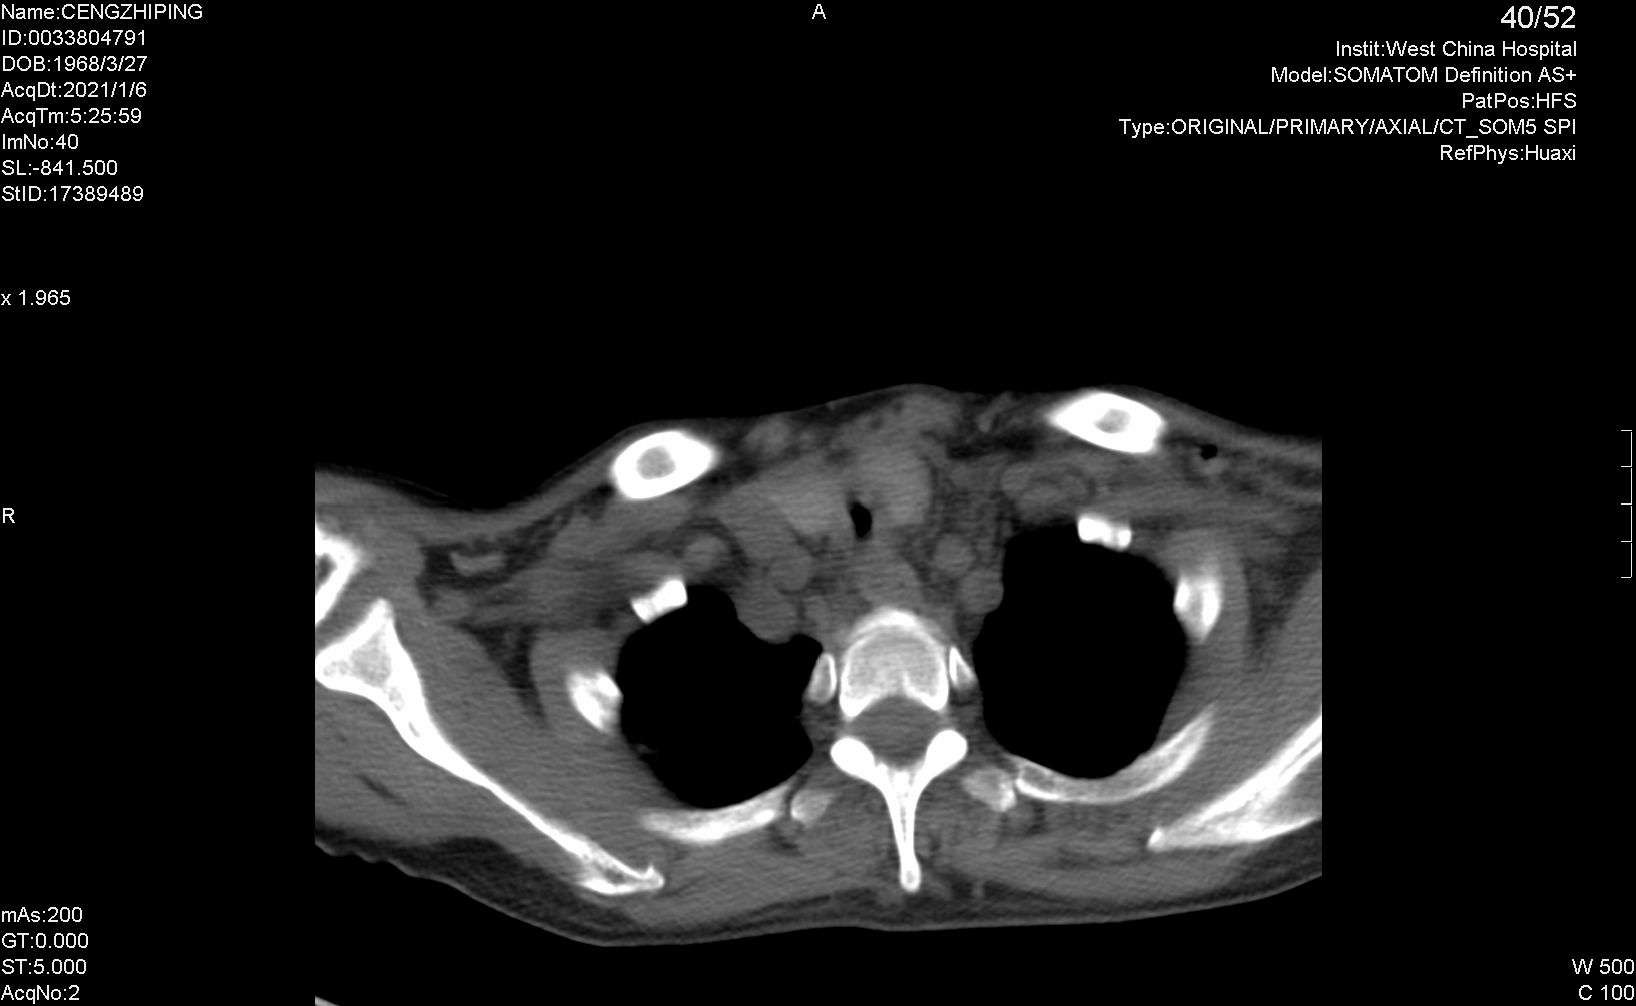

Supplement: Supplementary file 3 [file aee5b57756772a1eeef63034.docx]
